# Supplementary material for: Synthesis of highly luminescent core–shell nanoprobes in a single pot for ofloxacin detection in blood serum and water
Source: Royal Society of Chemistry journal article supplement (doi:10.1039/d3dt04295b), 2024-01-01
Supplement: d3dt04295b1.pdf [file d3dt04295b1.pdf]

## Supporting Information

# Synthesis of Highly Luminescent Core-shell Nanoprobes in a Single Pot for Ofloxacin Detection in Blood Serum, and Water

Pallavi Kadian<sup>a</sup>, Astha Singh<sup>a</sup>, Manish Kumar<sup>b</sup>, Kanchan Kumari <sup>a</sup>, Deepika Sharma<sup>a</sup>, Jaspreet Kaur Randhawa<sup>\*b</sup>

<sup>a</sup> School of Chemical Sciences, Indian Institute of Technology, Mandi

<sup>b</sup> School of Materials and Mechanical Engineering, Indian Institute of Technology, Mandi

\*Corresponding Author: [jaspreet@iitmandi.ac.in](mailto:jaspreet@iitmandi.ac.in)

### Table of content

**Figure S1:** FTIR spectra of CSIONPs

**Figure S2:** N<sub>2</sub>- absorption isotherm of CSIONPs

**Figure S3:** Fluorescence emission spectra of CSIONPs in different solvent

**Figure S4:** lifetime decay plot of CSIONPs in different solvents

**Table S1:** lifetime of CSIONPs in different solvents

**Figure S5:** Fluorescence emission spectra of CSIONPs in solid state at 350nm

**Figure S6:** Fluorescence emission spectra of CSIONPs in DMF at different temperature

**Figure S7:** Fluorescence emission spectra of CSIONPs in PBS at different pH

**Figure S8:** Fluorescence emission spectra of CSIONPs in mixture of DMF and glycerol of varying composition

**Figure S9:** F<sub>0</sub>/F vs time plot

**Figure S10:** Fluorescence emission spectra (a) quinine sulphate, and (b) CSIONPs at 350nm

**Figure S11:** FTIR spectra (a) CSIONPs + OLF and (b) OLF

**Figure S12:** Detection of OLF by CSIONPs in the tap water(a) and the blood serum(b).

**Table S2:** Documented percentage of ofloxacin recovery in water and blood serum as per the literature.

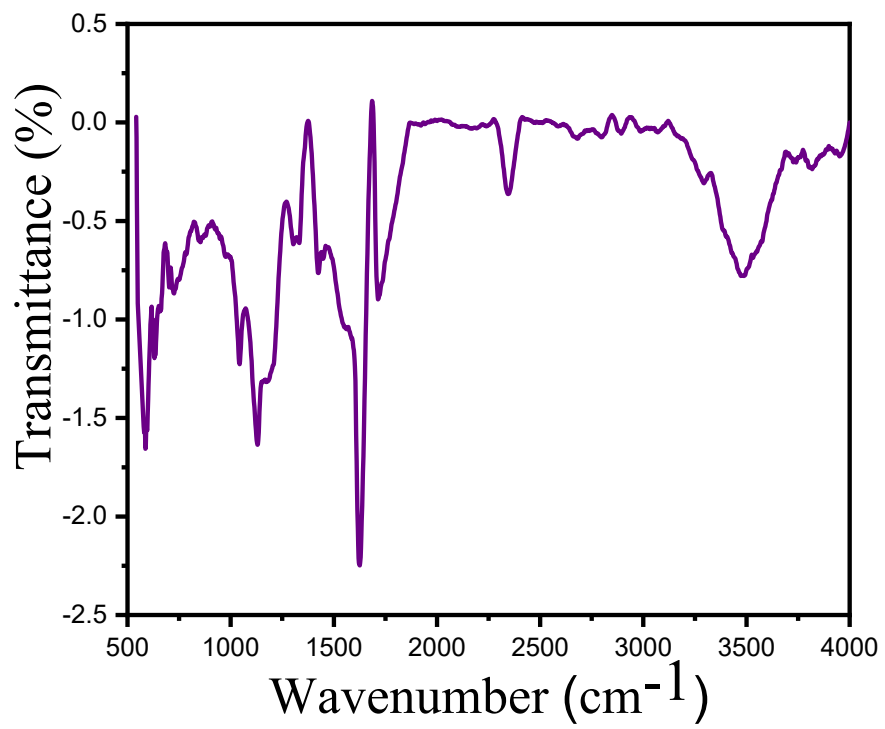

**Figure S1:** FTIR spectra of CSIONPs

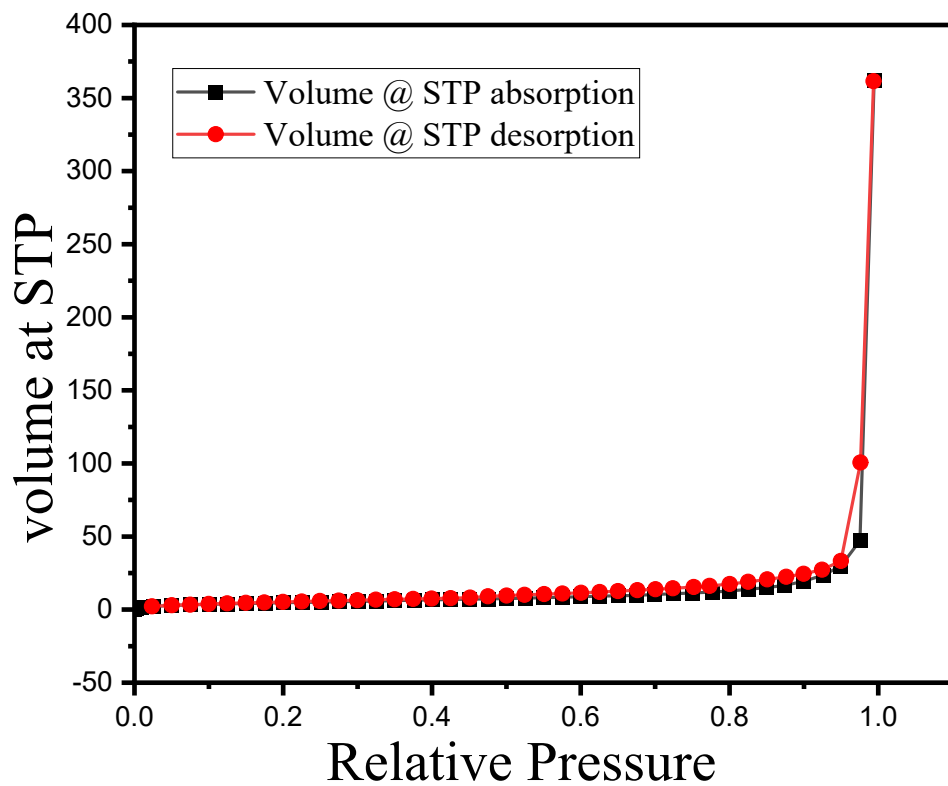

**Figure S2:** N<sub>2</sub>- adsorption isotherm of CSIONPs

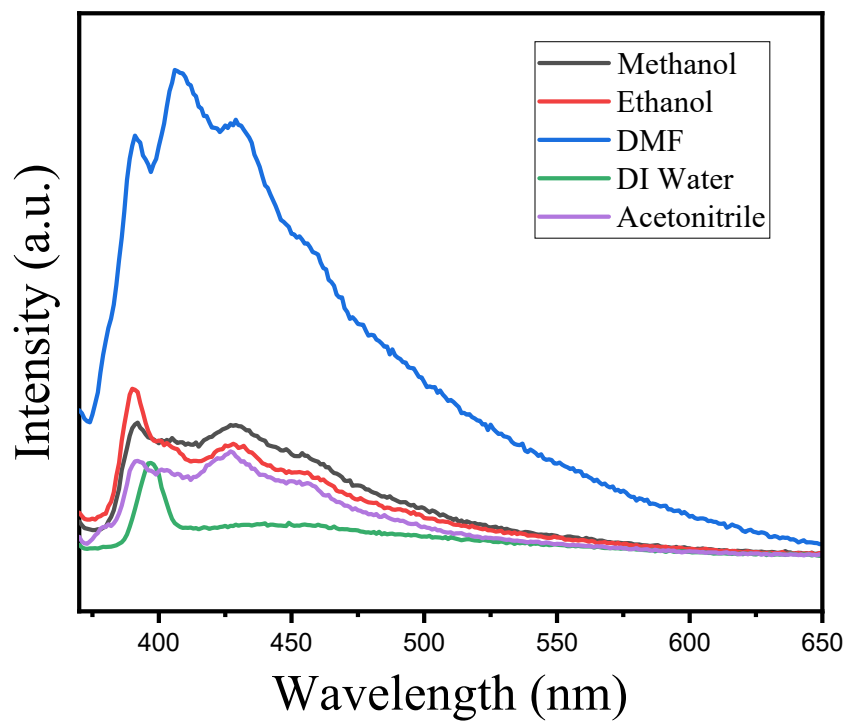

**Figure S3:** Fluorescence emission spectra of CSIONPs in different solvent

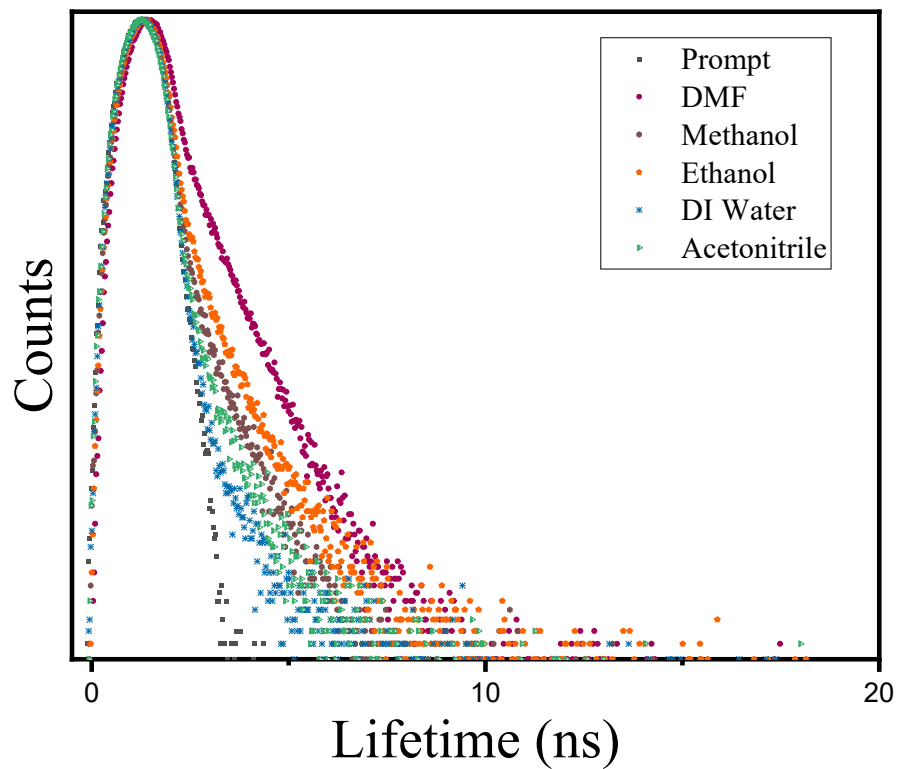

**Figure S4:** Lifetime decay plot of CSIONPs in different solvents

| <b>Solvent</b> | <b>Lifetime (ns)</b> |
|----------------|----------------------|
| DMF            | 0.230                |
| Methanol       | 0.062                |
| Ethanol        | 0.130                |
| DI Water       | 0.054                |
| Acetonitrile   | 0.028                |

**Table S1:** Lifetime of CSIONPs in different solvents

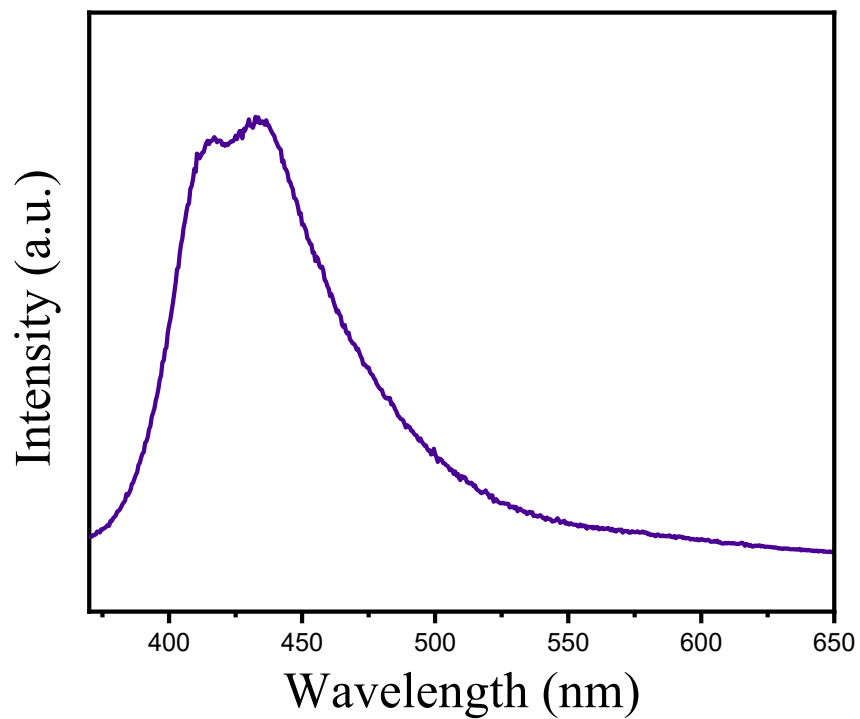

**Figure S5:** Fluorescence emission spectra of CSIONPs in solid state at 350nm.

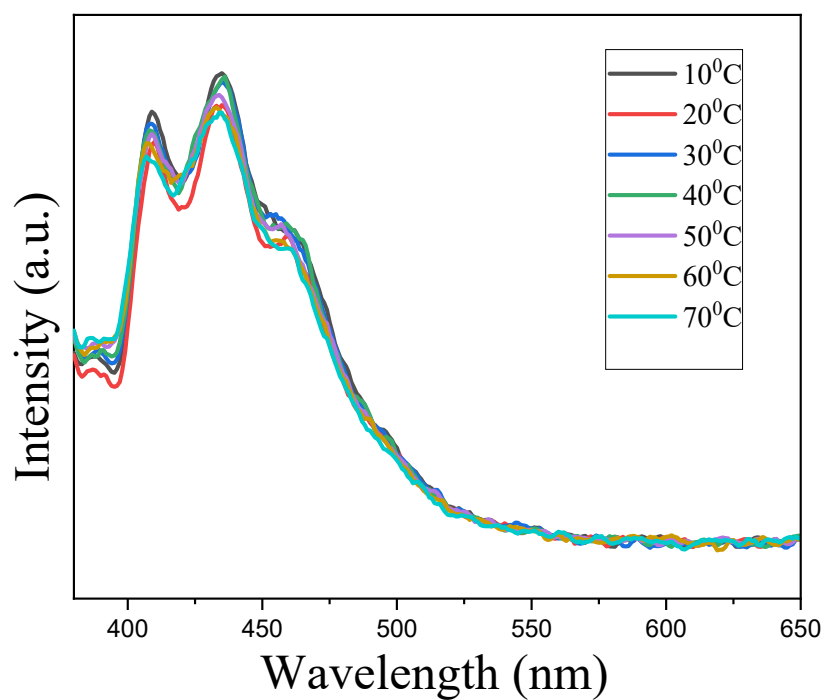

**Figure S6:** Fluorescence emission spectra of CSIONPs in DMF at different temperature.

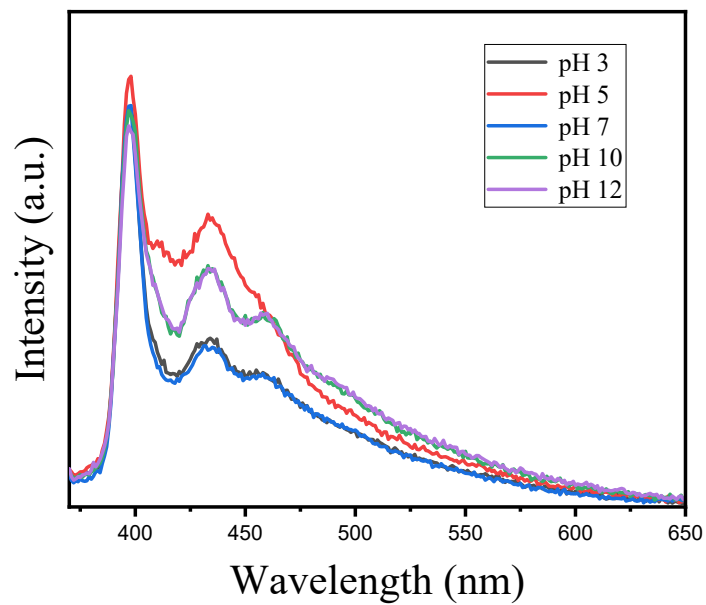

**Figure S7:** Fluorescence emission spectra of CSIONPs in PBS at different pH.

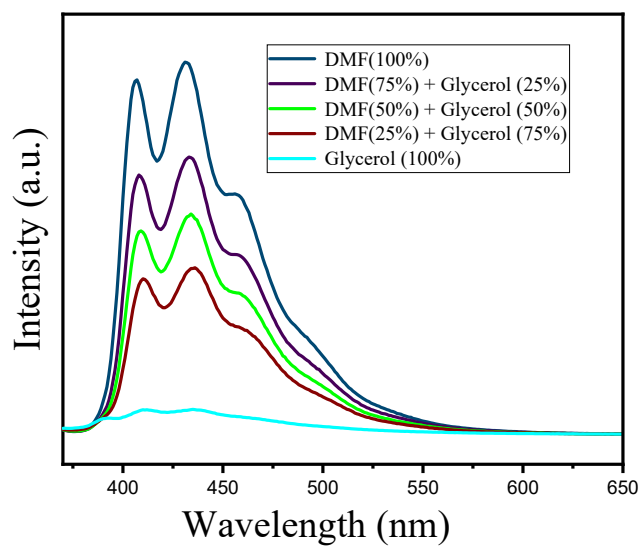

**Figure S8:** Fluorescence emission spectra of CSIONPs in mixture of DMF and glycerol of varying composition.

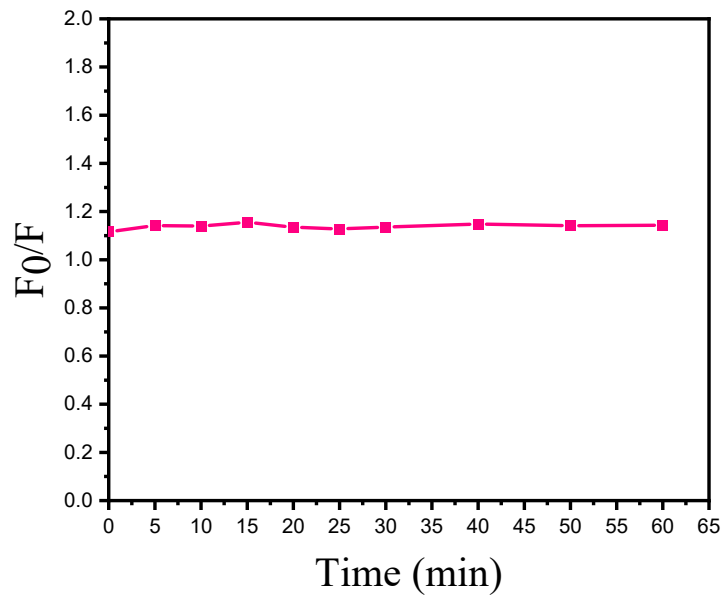

**Figure S9:** F<sub>0</sub>/F vs time plot

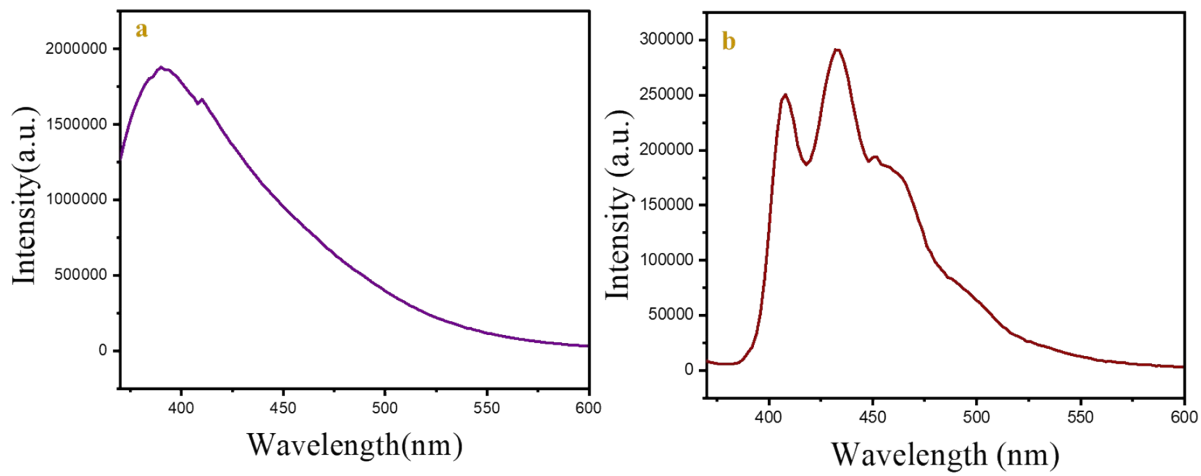

**Figure S10:** Fluorescence emission spectra (a) quinine sulphate, and (b) CSIONPs at 350nm

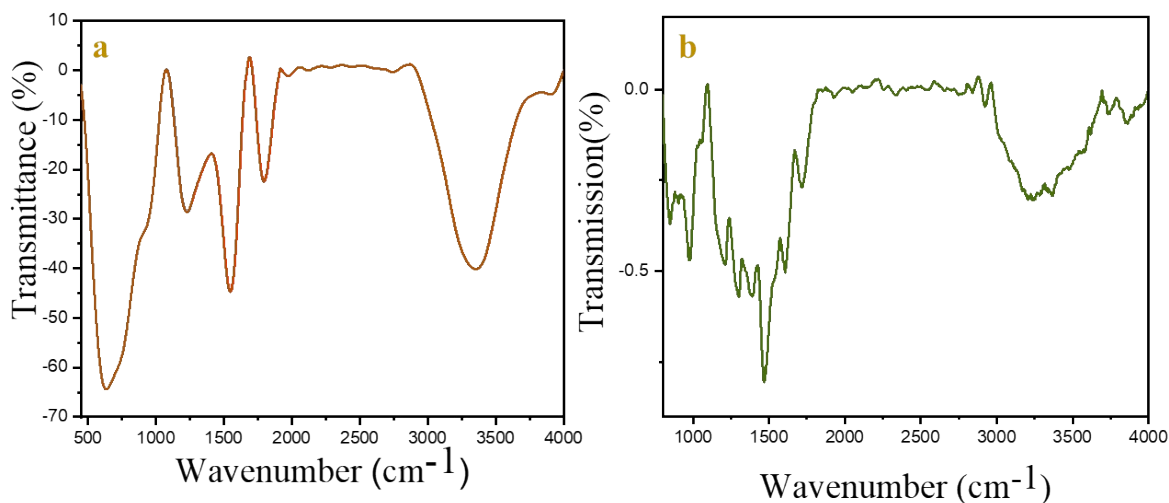

**Figure S11:** FTIR spectra (a) CSIONPs + OLF and (b) OLF

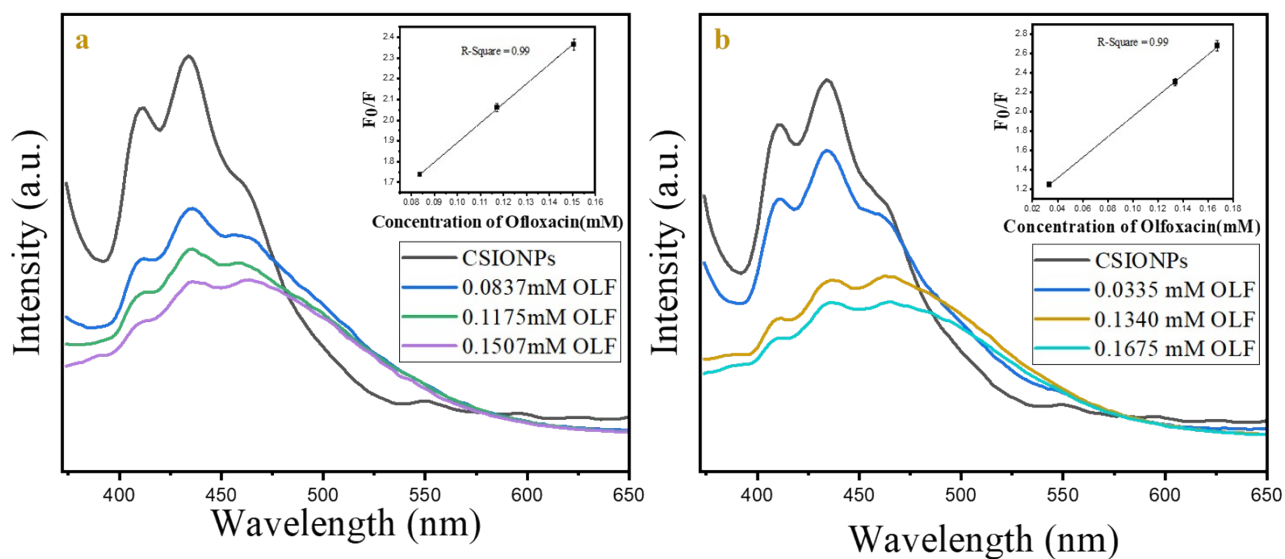

**Figure S12:** Detection of OLF by CSIONPs in the tap water(a) and the blood serum(b).

| Sensing probe        | Sensing method  | Recovery (%) in water | Recovery (%) in blood serum | Reference |
|----------------------|-----------------|-----------------------|-----------------------------|-----------|
| PtNPs/KB/CD-MOFs/GCE | Electrochemical | -                     | 91% to 103%                 | 1         |



|                                                    |                 |                    |               |          |
|----------------------------------------------------|-----------------|--------------------|---------------|----------|
| SG-I                                               | Fluorescence    | 104.47–117.76%     | -             | 2        |
| Aptamer and AuNPs                                  | colorimetric    | 102.62 to 107.60%  | -             | 3        |
| $\beta$ -CD/Sm <sub>2</sub> O <sub>3</sub> NPs/LIG | Electrochemical | 98.00 % ~ 107.30 % | -             | 4        |
| Ag NCs-Cu <sup>2+</sup>                            | Fluorescence    | -                  | 98.4–101.5%   | 5        |
| P-L CuO:Tb <sup>3+</sup> NS/GCE                    | Electrochemical | -                  | 98.3-100.5%   | 6        |
| CSIONPs                                            | Fluorescence    | 89.9-96.0%         | 95.52-103.28% | Our work |

**Table S2:** Documented percentage of ofloxacin recovery in water and blood serum as per the literature.

## REFERNCES

1. Luan, F. *et al.* Facile synthesis of a cyclodextrin-metal organic framework decorated with Ketjen Black and platinum nanoparticles and its application in the electrochemical detection of ofloxacin. *Analyst* **145**, 1943–1949 (2020).
2. Yi, H. *et al.* Fluorometric determination for ofloxacin by using an aptamer and SYBR Green I. *Microchimica Acta* **186**, (2019).
3. Zhou, X. *et al.* Colorimetric determination of ofloxacin using unmodified aptamers and the aggregation of gold nanoparticles. *Microchimica Acta* **185**, (2018).
4. Liu, Z. *et al.* Highly efficient detection of ofloxacin in water by samarium oxide and  $\beta$ -cyclodextrin-modified laser-induced graphene electrode. *Microchemical Journal* **186**, 108353 (2023).
5. Mao, B., Qu, F., Zhu, S. & You, J. Fluorescence turn-on strategy based on silver nanoclusters-Cu<sup>2+</sup> system for trace detection of quinolones. *Sens Actuators B Chem* **234**, 338–344 (2016).
6. Taherzadeh, M., Jahani, S., Moradalizadeh, M. & Froughi, M. M. Synthesis of a dual-functional terbium doped copper oxide nanoflowers for high-efficiently electrochemical sensing of ofloxacin, pefloxacin and gatifloxacin. *Talanta* **255**, 124216 (2023).
